# Supplementary material for: Dietary Patterns and Risk of Dementia: a Systematic Review and Meta-Analysis of Cohort Studies
Source: Springer Nature journal article supplement (doi:10.1007/s12035-015-9516-4), 2015-11-09

**Supplementary fig 1. Funnel plots show the association between antioxidants and dementia.**

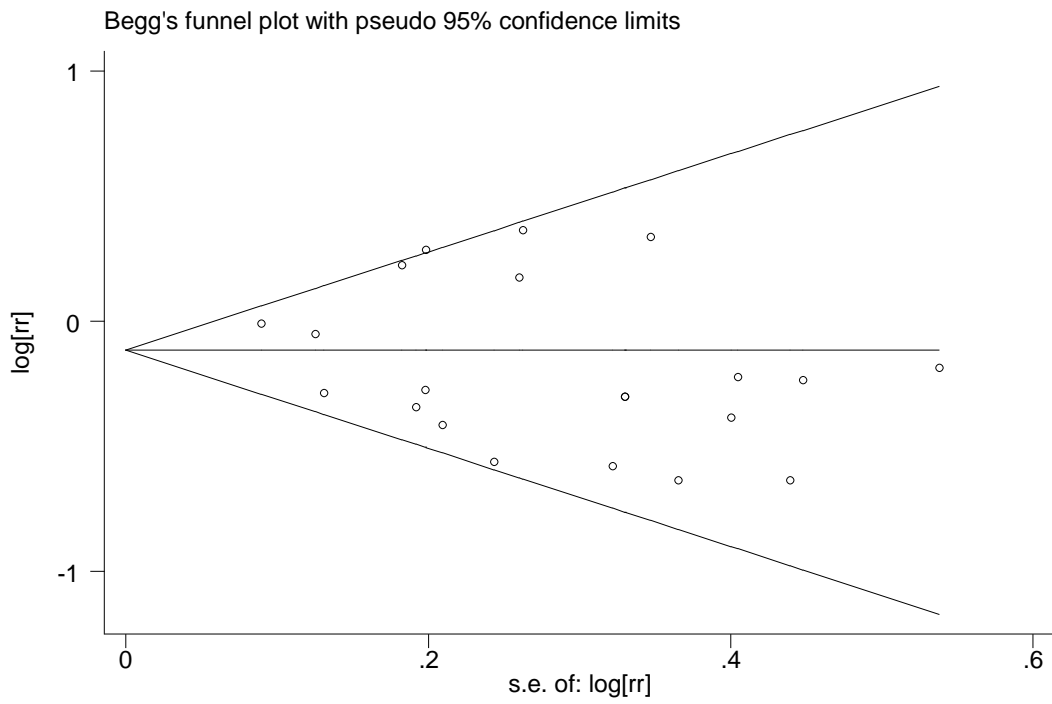

**Supplementary fig 2. Funnel plots show the association between B vitamins and dementia.**

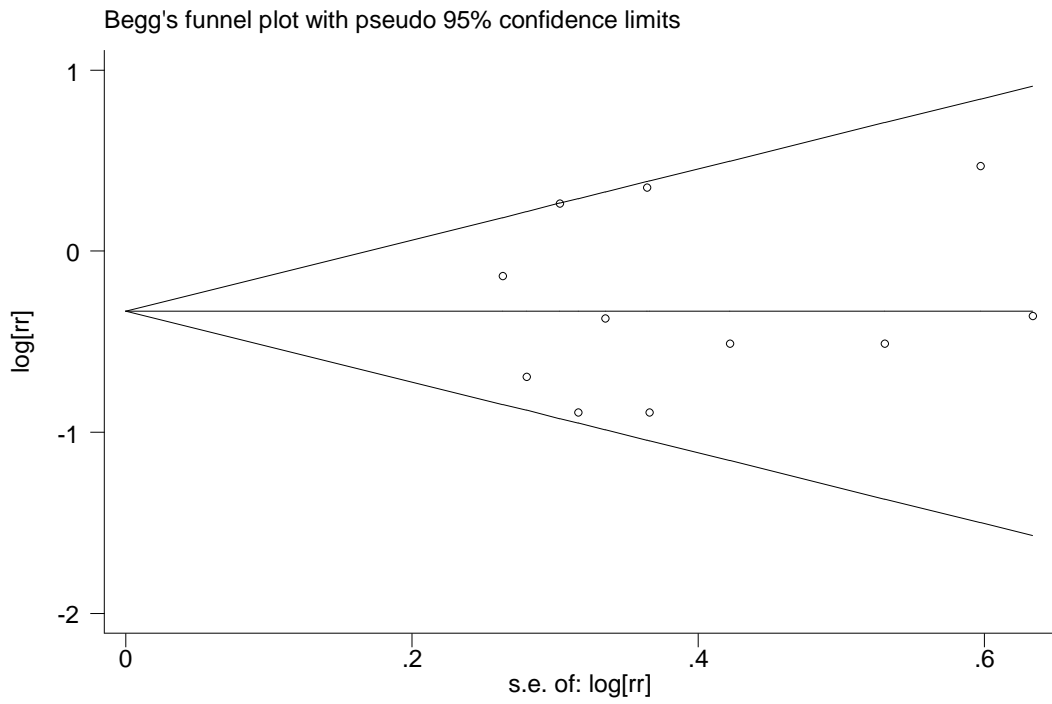

**Supplementary fig 3. Forest plots show the association between vitamin D and dementia.**

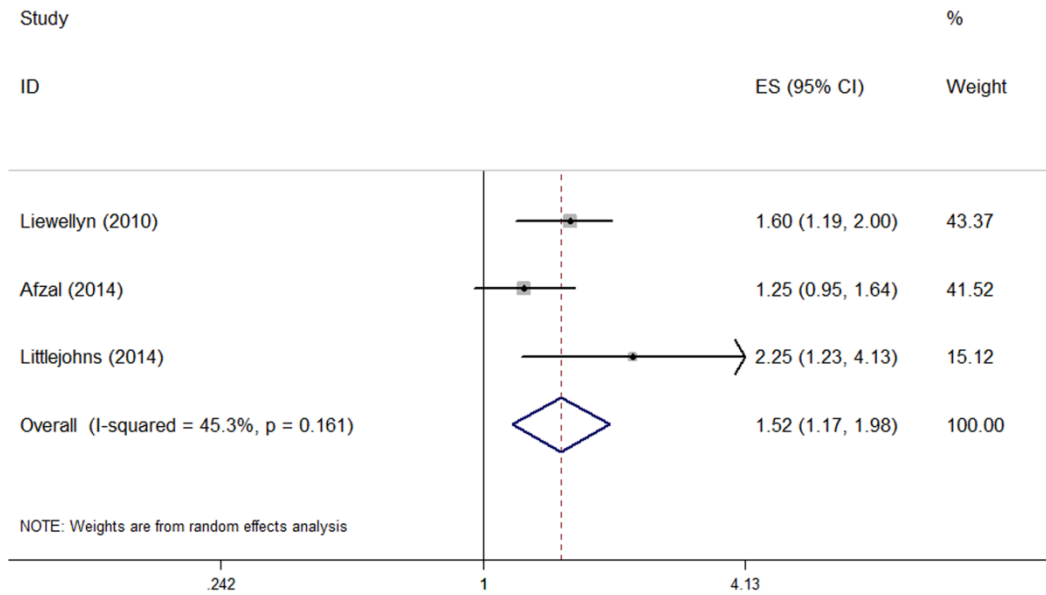

**Supplementary fig 4. Forest plots show the association between MeDi and dementia.**

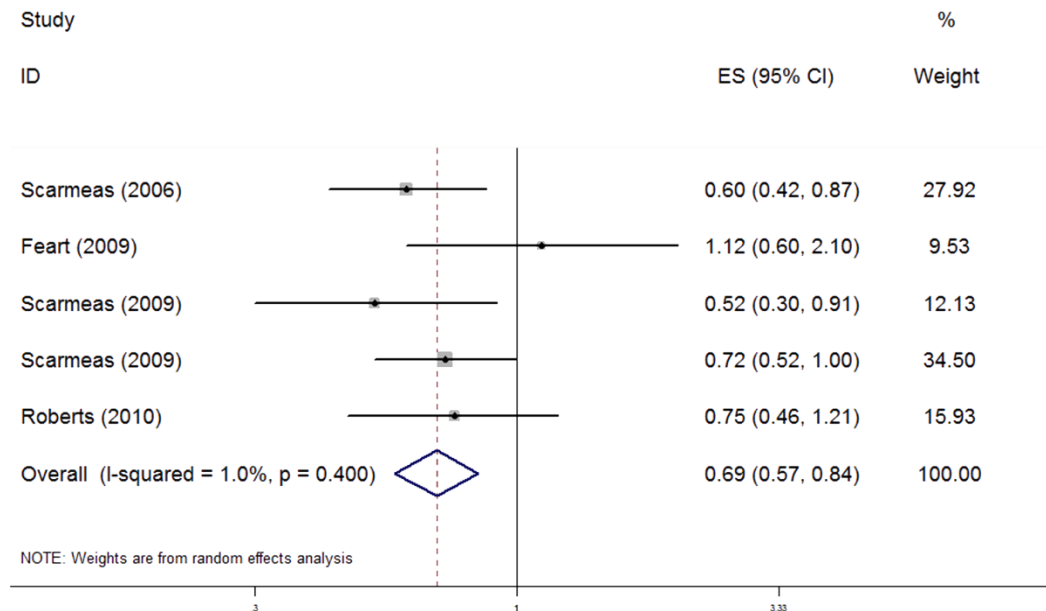

**Supplementary fig 5. Forest plots show the association between Aluminium and dementia.**

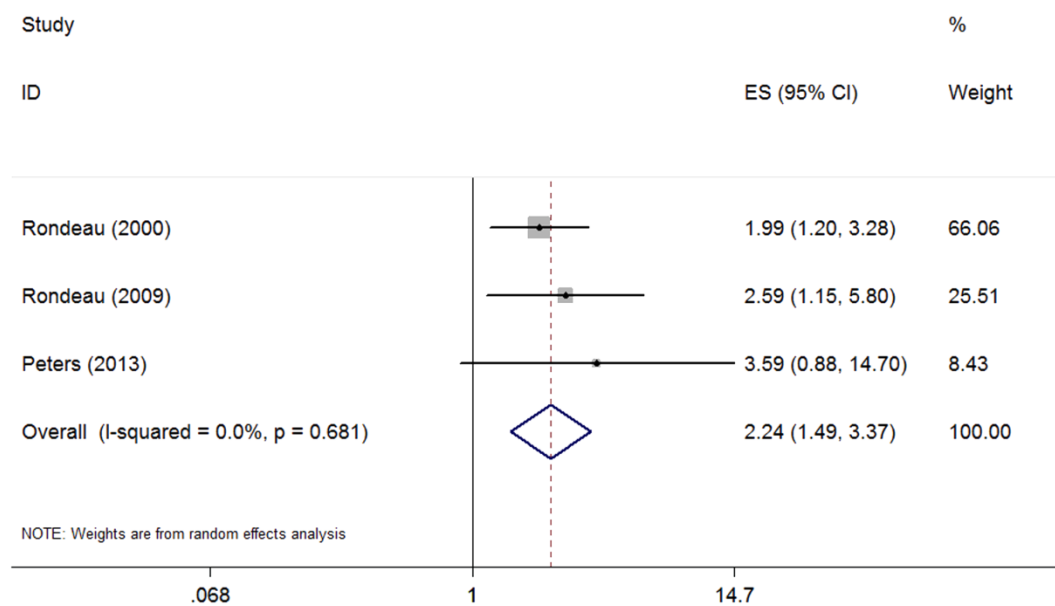

**Supplementary fig 6. Forest plots show the association between fish and dementia.**

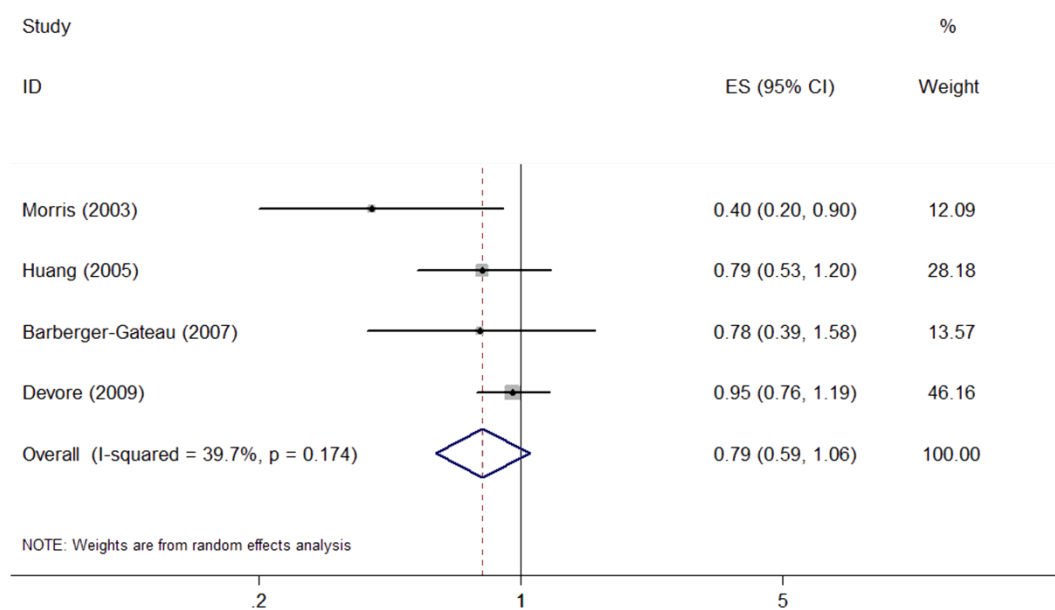

**Supplementary fig 7. Forest plots show the association between vegetables and fruits and dementia.**

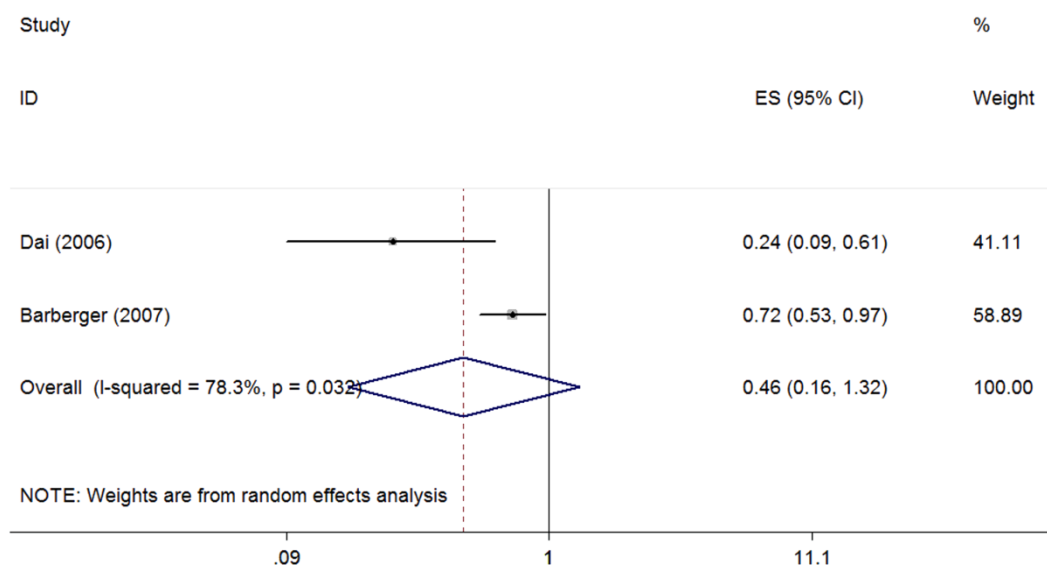

**Supplementary fig 8. Forest plots show the association between drinking and dementia.**

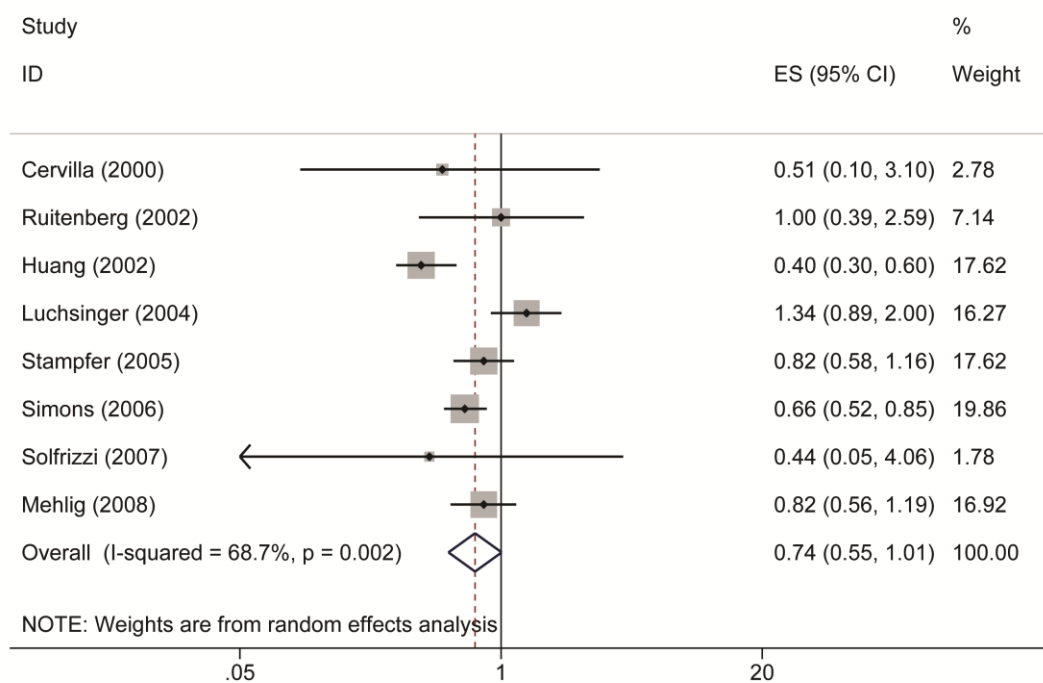

Supplement: 12035_2015_9516_MOESM1_ESM.pdf [file 12035_2015_9516_MOESM1_ESM.pdf]
